# Supplementary material for: Facile regeneration of lithium borohydride from anhydrous lithium metaborate using magnesium hydride
Source: Royal Society of Chemistry journal article supplement (doi:10.1039/d2qi01388f), 2022-01-01
Supplement: d2qi01388f1.pdf [file d2qi01388f1.pdf]

## Supporting Information of

### **Facile regeneration of lithium borohydride from anhydrous lithium metaborate using magnesium hydride**

Yongyang Zhu, <sup>\*a, b</sup> Mili Liu, <sup>d</sup> Jianding Li, <sup>\*c</sup> Weiwei Zeng, <sup>a, b</sup> Liming Zeng, <sup>a, b</sup>

Daifeng Wu, <sup>a, b</sup> Qing Zhou, <sup>a, b</sup> Renheng Tang, <sup>a, b</sup> Fangming Xiao <sup>a, b</sup>

a: Institute of Resources Utilization and Rare Earth Development, Key Laboratory of Separation and Comprehensive Utilization of Rare Metals, Guangdong Academy of Sciences, Guangzhou, 510650, People's Republic of China.

b: Institute of Resources Utilization and Rare Earth Development, Guangdong Provincial Key Laboratory of Rare Earth Development and Application, Guangdong Academy of Sciences, Guangzhou, 510650, People's Republic of China.

c: Huzhou Key Laboratory of Materials for Energy Conversion and Storage, School of Science, Huzhou University, Huzhou 313000, People's Republic of China

d: School of Materials Science and Engineering, Guangdong Provincial Key Laboratory of Advanced Energy Storage Materials, South China University of Technology, Guangzhou, 510641, People's Republic of China.

\* Author to whom correspondence should be addressed.

Yongyang Zhu, E-mail address: [yongyangzhu2016@163.com](mailto:yongyangzhu2016@163.com) Tel: 86-20-61086469,

Fax: 86-20-61086469; Jianding Li, E-mail address: [jiandingli@zjhu.edu.cn](mailto:jiandingli@zjhu.edu.cn)

## **Table of Contents**

|                          |     |
|--------------------------|-----|
| Table of Contents .....  | S-2 |
| Supplementary Data ..... | S-3 |
| Figure S1 .....          | S-3 |
| Figure S2 .....          | S-4 |
| Figure S3 .....          | S-5 |

Supplementary Data

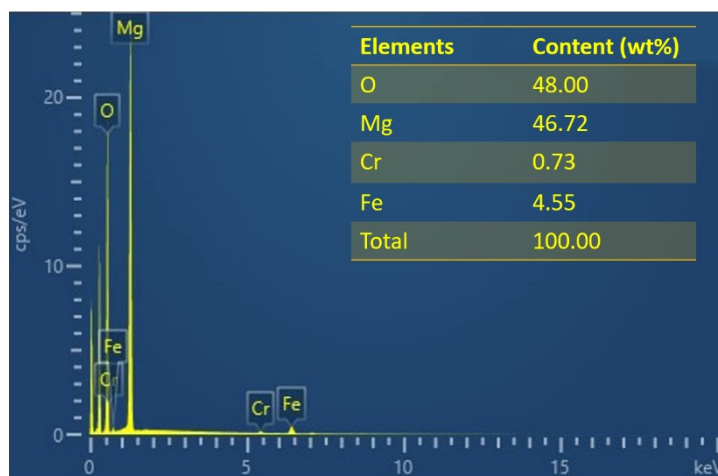

**Fig. S1** EDX spectra of the products obtained via ball milling a mixture of  $\text{MgH}_2$  and  $\text{LiBO}_2$  in 2:1 molar ratio for 20 h at 1000 CPM.

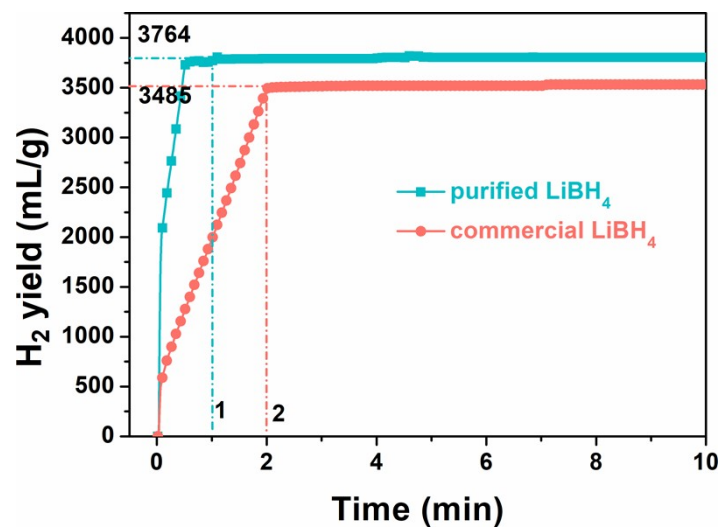

**Fig. S2** Hydrolysis curve of the regenerated LiBH<sub>4</sub> and commercial LiBH<sub>4</sub> in 0.5 wt% CoCl<sub>2</sub> aqueous solution.

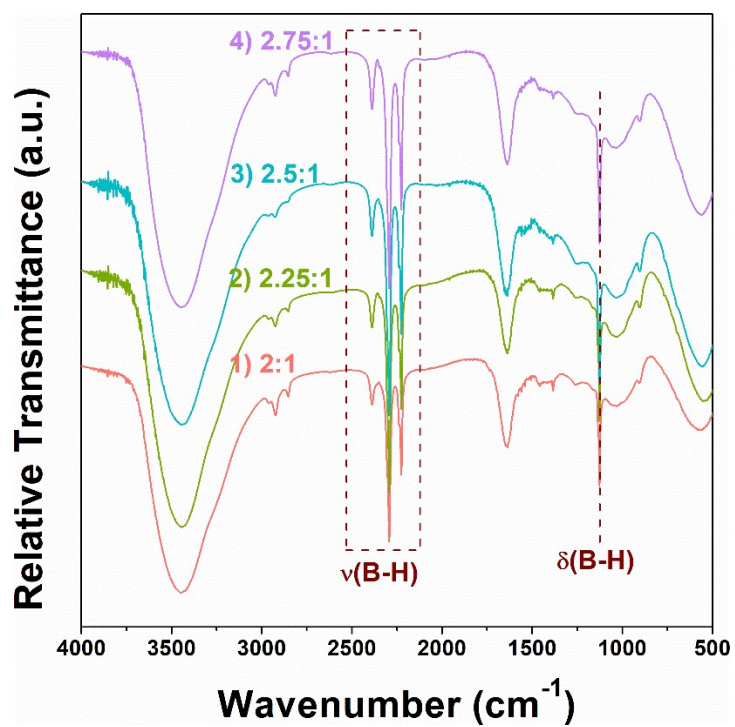

**Fig. S3** FTIR spectra of products obtained after ball milling MgH<sub>2</sub> and LiBO<sub>2</sub> in different molar ratios for 20 h at 1000 CPM under ambient conditions.
